# Supplementary material for: Mind the gap! The mitochondrial control region and its power as a phylogenetic marker in echinoids
Source: PubMed Central journal article supplement (PMC5977486; doi:10.1186/s12862-018-1198-x), 2018-05-30
Supplement: 12862_2018_1198_MOESM1_ESM.pdf [file 12862_2018_1198_MOESM1_ESM.pdf]

# Mind the Gap! The mitochondrial control region and its power as a phylogenetic marker in echinoids

## Authors

Omri Bronstein<sup>\*,a,b</sup>

Andreas Kroh<sup>a</sup>

Elisabeth Haring<sup>b,c</sup>

## Affiliation

<sup>a</sup> Natural History Museum Vienna, Geological-Paleontological Department, 1010 Vienna, Austria

<sup>b</sup> Natural History Museum Vienna, Central Research Laboratories, 1010 Vienna, Austria

<sup>c</sup> University of Vienna, Department of Integrative Zoology, Vienna, Austria

\* Corresponding author

E-mail address: [omribronstein@gmail.com](mailto:omribronstein@gmail.com)

Tel: +43-1-52177-610

Fax: +43-1-52177-459

## Keywords:

Control region; Molecular phylogeny; Mitochondrial markers; NGS; Echinoidea

Additional file 1

**Fig. S1** Inverted tone image of an ethidium-bromide-stained agarose gel (1.5%), showing PCR products from the amplification (using the CRA primer pair: CR15fwd and CR08rev as discussed in the text) of various echinoid species. L denotes DNA ladder. Lane 1 – *Tripneustes gratilla elatensis*; 2 – *Diadema setosum*; 3 – *Lytechinus variegatus*; 4 – *Tripneustes kermadecensis*; 5 – *Clypeaster rarispinus*; 6 – *Echinometra* sp.; 7 – *Periocosmus bidens*; 8 – *Eucidaris metularia*; 9 – *Paracentrotus lividus*; 10 – *Araeosoma splendens*; 11 – *Salmacis bicolor*; 12 – *Prionocidaris* sp.

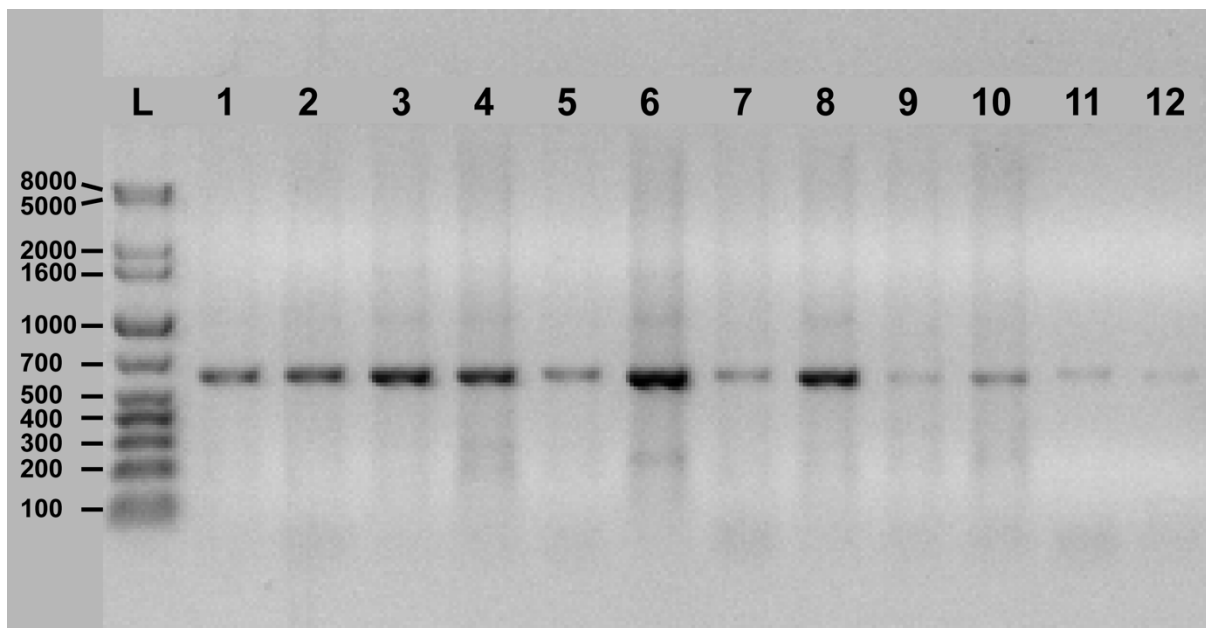

Additional file 1

**Fig. S2** Sequencing results shown as a four-color chromatogram of a portion of the CR adjacent to the guanine stretch (Poly-G stretch) from a specimen of *Tripneustes gratilla*. Sequencing signal drops abruptly and sequencing does not continue past this region.

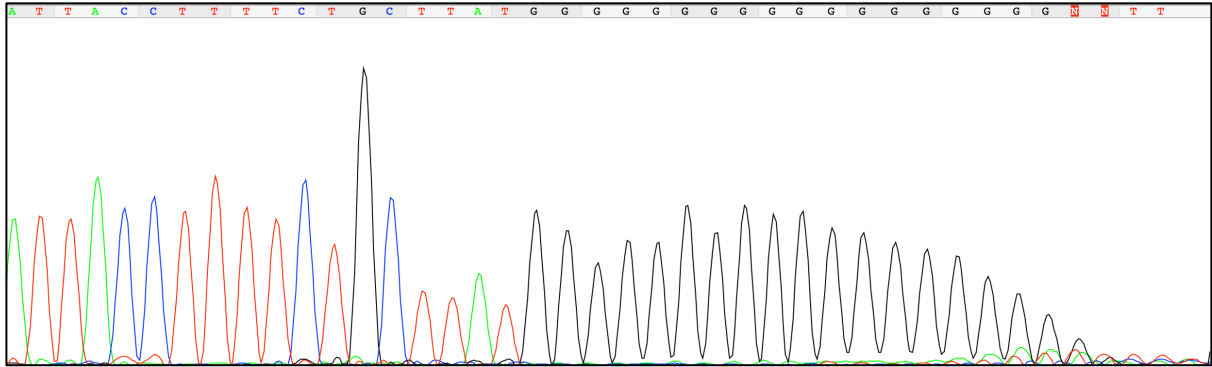

**Fig. S3** Substitution saturation plots. The number of transitions (*s*) and transversions (*v*) is plotted against F84 genetic distance (Felsenstein, 1984). **A** – *COI* codon position 1&2; **B** – *COI* codon position 3; **C** – 16S; **D** – CRA.

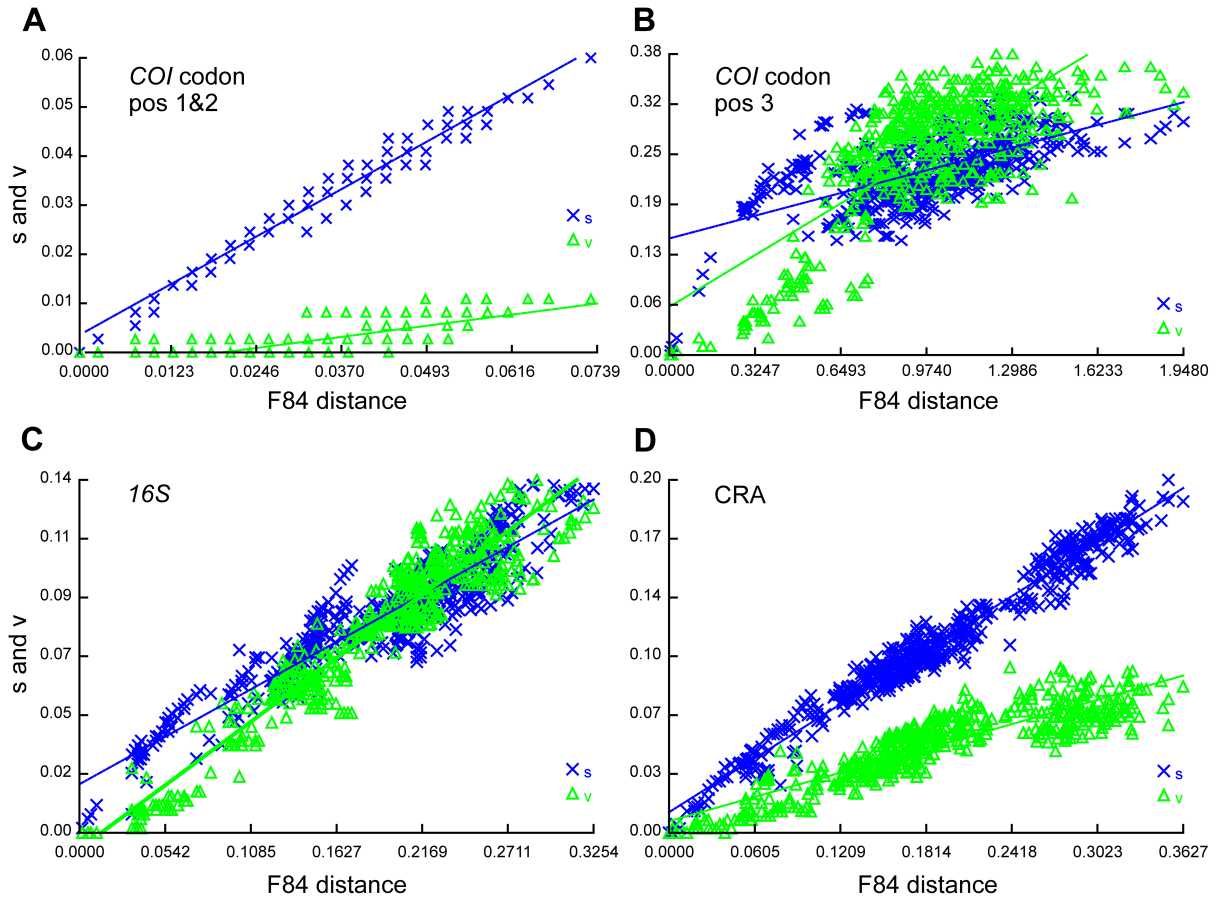

**Table S1** Substitution saturation analysis for the different markers based on the index of substitution saturation (Xia et al., 2003; Xia and Lemey, 2009), as implemented in DAMBE6 (Xia, 2017).

| Marker dataset  | Number of OTU <sup>a</sup> | I <sub>ss</sub> <sup>b</sup> | I <sub>ss.cSym</sub> <sup>c</sup> | df <sup>d</sup> | p value <sup>e</sup> | I <sub>ss.cASym</sub> <sup>f</sup> | df <sup>d</sup> | p value <sup>e</sup> |
|-----------------|----------------------------|------------------------------|-----------------------------------|-----------------|----------------------|------------------------------------|-----------------|----------------------|
| <i>Mito-COI</i> |                            |                              |                                   |                 |                      |                                    |                 |                      |
| Codons 1&2      |                            |                              |                                   |                 |                      |                                    |                 |                      |
|                 | 4                          | 0.054                        | 0.786                             | 244             | <0.0001              | 0.756                              | 244             | <0.0001              |
|                 | 8                          | 0.055                        | 0.740                             | 244             | <0.0001              | 0.629                              | 244             | <0.0001              |
|                 | 16                         | 0.054                        | 0.697                             | 244             | <0.0001              | 0.488                              | 244             | <0.0001              |
|                 | 32                         | 0.053                        | 0.688                             | 244             | <0.0001              | 0.359                              | 244             | <0.0001              |
| <i>Mito-COI</i> |                            |                              |                                   |                 |                      |                                    |                 |                      |
| Codon 3         |                            |                              |                                   |                 |                      |                                    |                 |                      |
|                 | 4                          | 0.665                        | 0.777                             | 177             | 0.0032               | 0.772                              | 177             | 0.0050               |
|                 | 8                          | 0.685                        | 0.737                             | 177             | 0.1348               | 0.642                              | 177             | 0.2086               |
|                 | 16                         | 0.681                        | 0.637                             | 177             | 0.1607               | 0.454                              | 177             | <0.0001              |
|                 | 32                         | 0.684                        | 0.695                             | 177             | 0.7165               | 0.386                              | 177             | <0.0001              |
| <i>Mito-16S</i> |                            |                              |                                   |                 |                      |                                    |                 |                      |
|                 | 4                          | 0.327                        | 0.799                             | 351             | <0.0001              | 0.767                              | 351             | <0.0001              |
|                 | 8                          | 0.356                        | 0.757                             | 351             | <0.0001              | 0.646                              | 351             | <0.0001              |
|                 | 16                         | 0.359                        | 0.731                             | 351             | <0.0001              | 0.520                              | 351             | <0.0001              |
|                 | 32                         | 0.363                        | 0.708                             | 351             | <0.0001              | 0.380                              | 351             | 0.5882               |
| <i>Mito-CRA</i> |                            |                              |                                   |                 |                      |                                    |                 |                      |
|                 | 4                          | 0.248                        | 0.789                             | 333             | <0.0001              | 0.757                              | 333             | <0.0001              |
|                 | 8                          | 0.267                        | 0.743                             | 333             | <0.0001              | 0.631                              | 333             | <0.0001              |
|                 | 16                         | 0.273                        | 0.703                             | 333             | <0.0001              | 0.494                              | 333             | <0.0001              |
|                 | 32                         | 0.274                        | 0.692                             | 333             | <0.0001              | 0.363                              | 333             | 0.0021               |

<sup>a</sup> Number of sequences used in the random resampling.

<sup>b</sup> index of substitution saturation.

<sup>c</sup> critical value for a symmetrical tree topology.

<sup>d</sup> degrees of freedom.

<sup>e</sup> probability that I<sub>ss</sub> is significantly different from the critical value (I<sub>ss.cSym</sub>/I<sub>ss.cASym</sub>).

<sup>f</sup> critical value for an asymmetrical tree topology.

Note: two-tailed tests are used.
